# Supplementary material for: Close-range Hyperspectral Spectroscopy Reveals Leaf Water Content Dynamics
Source: Preprints.org preprint supplement (doi:10.20944/preprints202108.0497.v1), 2021-08-25
Supplement: Supplementary file 1 [file Supplementary file 1.docx]

Supplementary file 1.

**3D printable NIRONE sensor mount for continuous leaf measurements**

The NIRONE sensor mount (Figure 1), which was used in the experiment 3 was a custom design that was developed for the purpose of continuous leaf spectra measurements. The sensor fits inside the mount and the top part is used to attach the leaf in place to prevent any movements during the measurements. Black plastic was used in the print to prevent unnecessary reflections from the mount. Velcro straps were used for attaching the leaf and the sensor to the mount. In addition, rubber strips were used between the Velcro and the leaf for a better grip. The 3D model file can be found from the supplementary files.


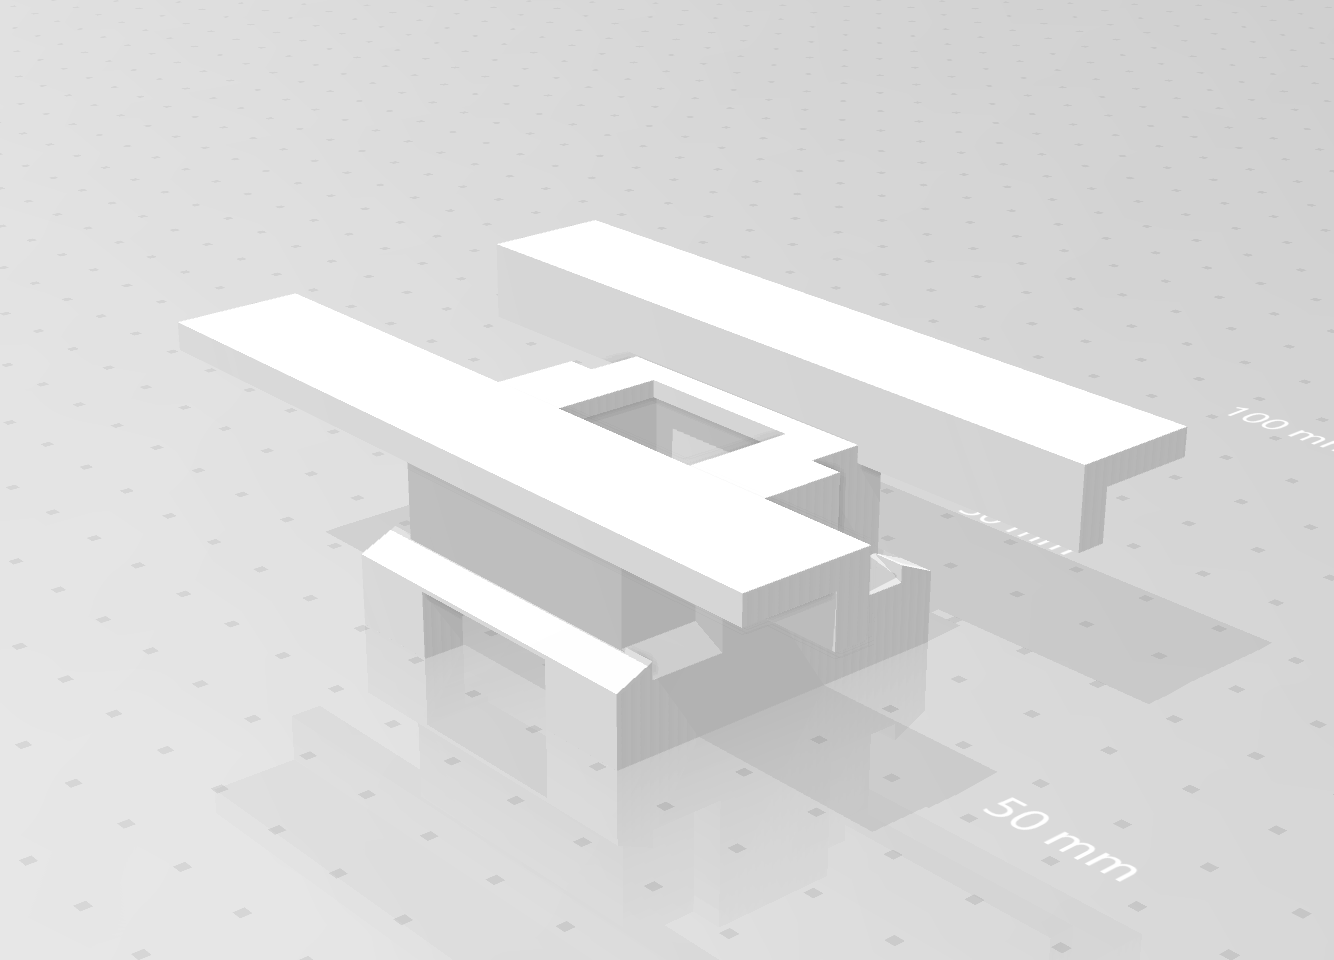


**Figure 1.** A picture of the 3D printable sensor mount model.
